# Supplementary material
Source: publisher figshare collection journal article supplement (https://sage.figshare.com/ndownloader/files/12398924)
Supplement: Supplementary file 1 [file 12398924]

## Sheet: Sheet1
Table S6. Summary of results of country level matching . Monitoring data variable is given in column A. Overall means pre matching for monitoring data and difference are given in columns B - D. Post matching means and difference are given in columns E - G. % balance improvement from matching is given in column H. Number of pairs of IBAs is given in column I.
			Pre matching data			Matched data
Monitoring data	IBAs < 10 km mean	IBAs > 100 km mean	Difference in means	IBAs < 10 km mean	IBAs > 100 km mean	Difference in means	% balance improvement from matching	n
Forest loss	0.1648	0.1392	0.0256	0.15	0.1454	0.0046	82.01	160
State change	0.7431	0.3886	0.3546	0.3751	0.422	-0.0469	85.63	4
Pressure change	0.4318	0.3209	0.1109	0.3335	0.3179	0.0156	85.95	16
Response change	0.3191	0.2708	0.0483	0.2879	0.2697	0.0182	62.36	18
